# Supplementary material for: Cultivable Alginate Lyase-Excreting Bacteria Associated with the Arctic Brown Alga Laminaria
Source: Mar Drugs. 2012 Nov 6;10(11):2481–91. doi: 10.3390/md10112481 (PMC3509530; doi:10.3390/md10112481)
Supplement: Supplementary File 1: — PDF-Document (PDF, 103 KB) [file marinedrugs-10-02481-s001.pdf]

## Supplementary Materials

**Figure S1.** The clear zone of the isolates formed on the screening plates after flooding with 10% (wt/vol) calcium chloride.

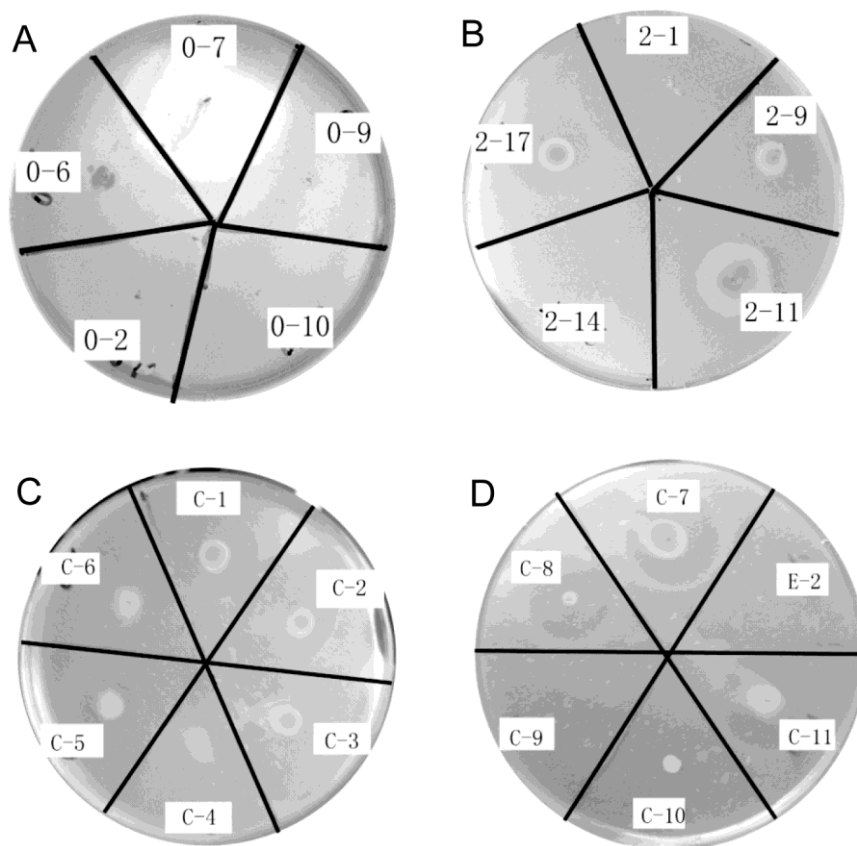

**Table S1.** Species affiliation of the 21 isolates.

|      | Name/Title                       | Strain        | Accession | Pairwise Similarity | Diff/Total nt |
|------|----------------------------------|---------------|-----------|---------------------|---------------|
| 0-3  | <i>Psychromonas arctica</i>      | Pull 5.3(T)   | AF374385  | 98.535              | 22/1502       |
| 0-4  | <i>Alteromonas fuliginea</i>     | CIP 105339(T) | AF529062  | 99.373              | 7/1117        |
| 0-7  | <i>Psychromonas arctica</i>      | Pull 5.3(T)   | AF374385  | 99.002              | 15/1503       |
| 0-8  | <i>Psychromonas arctica</i>      | Pull 5.3(T)   | AF374385  | 98.337              | 25/1503       |
| 2-1  | <i>Alteromonas fuliginea</i>     | CIP 105339(T) | AF529062  | 99.932              | 1/1472        |
| 2-2  | <i>Polaribacter butkevichii</i>  | KMM 3938(T)   | AY189722  | 98.563              | 20/1392       |
| 2-3  | <i>Psychrobacter fozii</i>       | NF23(T)       | AJ430827  | 99.865              | 2/1477        |
| 2-5  | <i>Polaribacter butkevichii</i>  | KMM 3938(T)   | AY189722  | 98.702              | 18/1397       |
| 2-9  | <i>Polaribacter butkevichii</i>  | KMM 3938(T)   | AY189722  | 98.532              | 21/1431       |
| 2-11 | <i>Winogradskyella pacifica</i>  | KMM 6019(T)   | GQ181061  | 98.241              | 25/1421       |
| 2-15 | <i>Psychrobacter fozii</i>       | NF23(T)       | AJ430827  | 97.497              | 18/1385       |
| 2-17 | <i>Polaribacter butkevichii</i>  | KMM 3938(T)   | AY189722  | 98.742              | 36/1438       |
| 3-5  | <i>Psychromonas arctica</i>      | Pull 5.3(T)   | AF374385  | 98.47               | 23/1503       |
| 3-12 | <i>Psychromonas arctica</i>      | Pull 5.3(T)   | AF374385  | 98.47               | 23/1504       |
| C-1  | <i>Pseudoalteromonas arctica</i> | A 37-1-2(T)   | DQ787199  | 99.799              | 3/1494        |
| C-2  | <i>Psychromonas arctica</i>      | Pull 5.3(T)   | AF374385  | 98.736              | 19/1503       |
| C-3  | <i>Psychromonas arctica</i>      | Pull 5.3(T)   | AF374385  | 98.337              | 25/1503       |
| C-5  | <i>Pseudoalteromonas arctica</i> | A 37-1-2(T)   | DQ787199  | 99.197              | 12/1494       |
| C-7  | <i>Pseudoalteromonas arctica</i> | A 37-1-2(T)   | DQ787199  | 100                 | 0/1494        |
| C-8  | <i>Psychromonas arctica</i>      | Pull 5.3(T)   | AF374385  | 98.669              | 20/1503       |
| C-11 | <i>Pseudoalteromonas arctica</i> | A 37-1-2(T)   | DQ787199  | 99.799              | 3/1494        |
| B-2  | <i>Winogradskyella pacifica</i>  | KMM 6019(T)   | GQ181061  | 98.67               | 19/1429       |
